# Supplementary material for: Synthesis and physiochemical properties of novel gemini surfactants with phenyl-1,4-bis(carbamoylmethyl) spacer
Source: Royal Society of Chemistry journal article supplement (doi:10.1039/c5ra13616d), 2015-01-01
Supplement: c5ra13616d2.pdf [file c5ra13616d2.pdf]

zy-c12

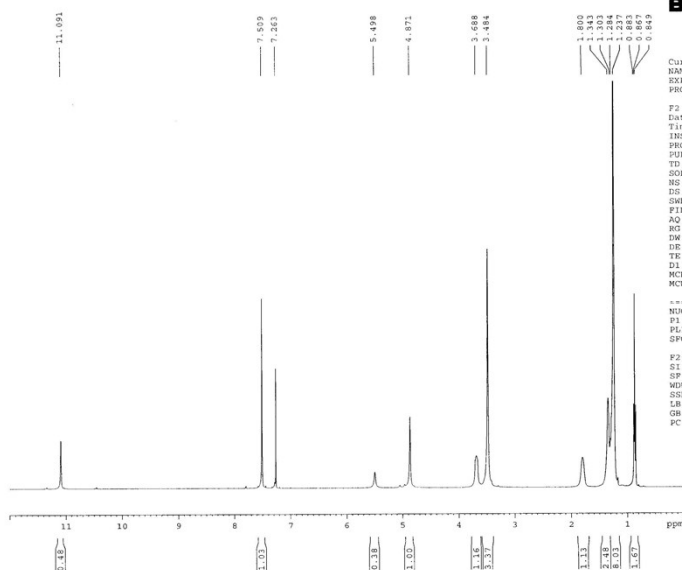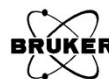

Current Data Parameters  
NAME 4-23-2013  
EXPNO 14  
PROCNO 1

F2 - Acquisition Parameters  
Date\_ 20130423  
Time\_ 9.58  
INSTRUM Av400  
PROBHD 5 mm BBO BB-1H  
PULPROG zg30  
TD 65536  
SOLVENT CDCl3  
NS 16  
DS 2  
SWH 12254.902 Hz  
FIDRES 0.186595 Hz  
AQ 2.6739187 sec  
RG 161.3  
DW 40.800 usec  
DE 6.00 usec  
TE 293.2 K  
DI 1.0000000 sec  
MCREST 0.0150000 sec  
MCWRK 0.0150000 sec

\*\*\*\*\* CHANNEL f1 \*\*\*\*\*  
NUC1 1H  
P1 9.10 usec  
PL1 -2.00 dB  
SFO1 400.1324710 MHz

F2 - Processing parameters  
SI 32768  
SF 400.1300099 MHz  
WDW EM  
SSB 0  
LB 0.30 Hz  
GB 0  
PC 1.00

Gemini surfactant a

zy-c14

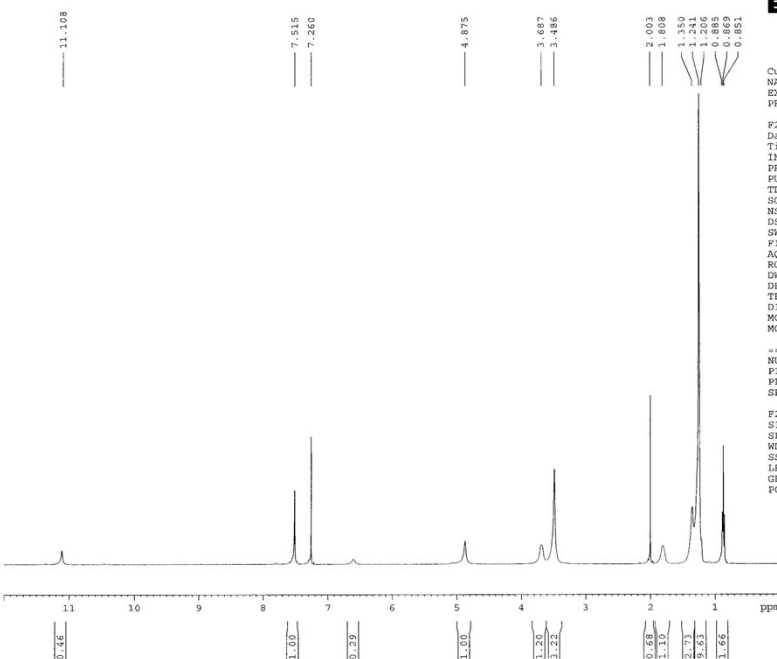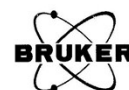

Current Data Parameters  
NAME 4-10-2013  
EXPNO 13  
PROCNO 1

F2 - Acquisition Parameters  
Date\_ 20130410  
Time\_ 11.16  
INSTRUM Av400  
PROBHD 5 mm BBO BB-1H  
PULPROG zg30  
TD 65536  
SOLVENT CDCl3  
NS 16  
DS 2  
SWH 12254.902 Hz  
FIDRES 0.186595 Hz  
AQ 2.6739187 sec  
RG 161.3  
DW 40.800 usec  
DE 6.00 usec  
TE 294.1 K  
DI 1.0000000 sec  
MCREST 0.0000000 sec  
MCWRK 0.0150000 sec

\*\*\*\*\* CHANNEL f1 \*\*\*\*\*  
NUC1 1H  
P1 9.10 usec  
PL1 -2.00 dB  
SFO1 400.1324710 MHz

F2 - Processing parameters  
SI 32768  
SF 400.1300099 MHz  
WDW EM  
SSB 0  
LB 0.30 Hz  
GB 0  
PC 1.00

Gemini surfactant b

zy-c16

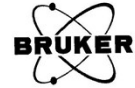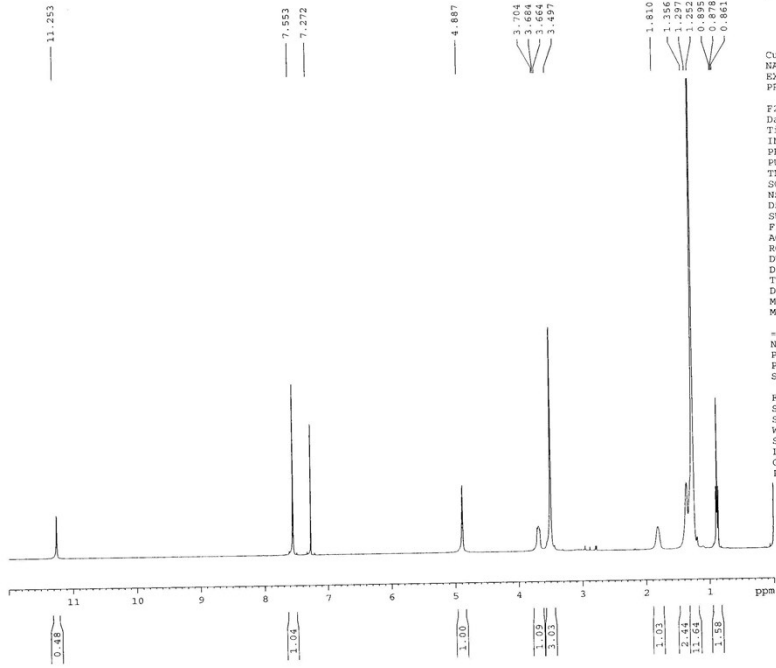

Current Data Parameters  
NAME 4-18-2013  
EXPNO 2  
PROCNO 1

F2 - Acquisition Parameters  
Date\_ 20130418  
Time 7.17  
INSTRUM Av400  
PROBHD 5 mm BBO BB-1H  
PULPROG zgpg30  
TD 65536  
SOLVENT CDCl3  
NS 16  
DS 2  
SWH 12254.902 Hz  
FIDRES 0.186995 Hz  
AQ 2.6739187 sec  
RG 181  
DW 40.800 usec  
DE 6.00 usec  
TE 293.9 K  
D1 1.0000000 sec  
MCREST 0.0000000 sec  
MCWRK 0.01500000 sec

==== CHANNEL f1 =====  
NUC1 1H  
P1 9.10 usec  
PL1 -2.00 dB  
SFO1 400.1324710 MHz

F2 - Processing parameters  
SI 32768  
SF 400.130053 MHz  
WDW EM  
SSB 0  
LB 0.30 Hz  
GB 0  
PC 1.00

Gemini surfactant c
