# Supplementary material for: Synthesis and physiochemical properties of novel gemini surfactants with phenyl-1,4-bis(carbamoylmethyl) spacer
Source: Royal Society of Chemistry journal article supplement (doi:10.1039/c5ra13616d), 2015-01-01

20141224\_zhangyue\_3 353 (0.748) Cm (320:382)

1: TOF MS ES+  
1.43e8

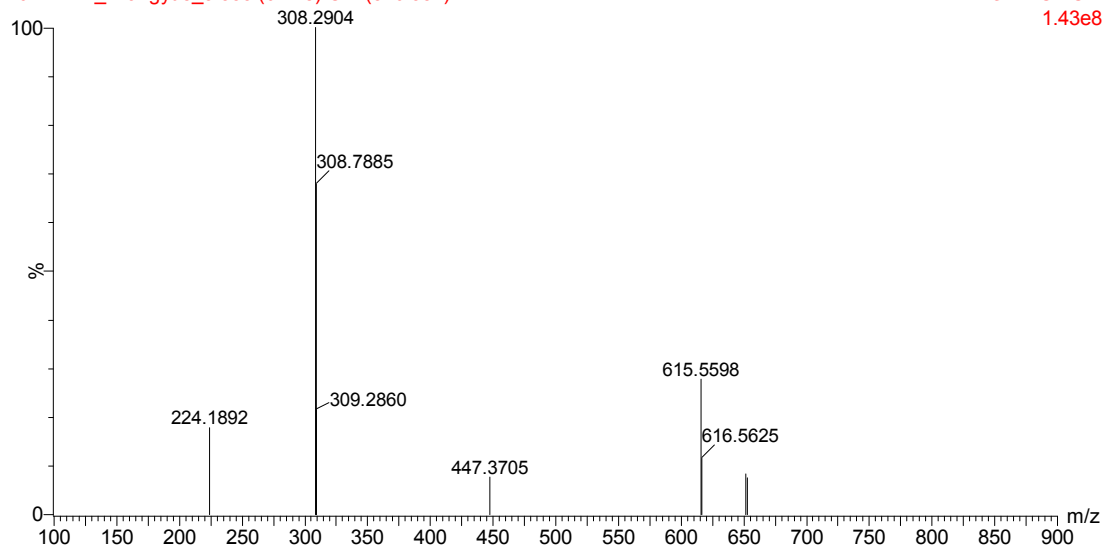

(Gemini surfactants a)

20141224\_zhangyue\_4 519 (1.084) Cm (519:633)

1: TOF MS ES+  
2.87e8

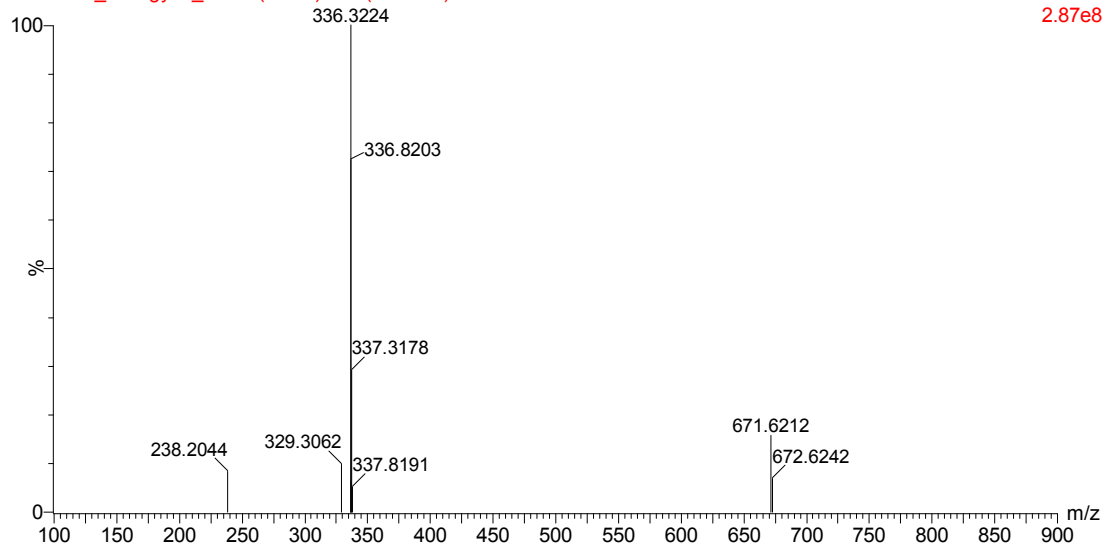

(Gemini surfactants b)

20141224\_zhangyue\_5 676 (1.422) Cm (671:906)

1: TOF MS ES+  
5.87e8

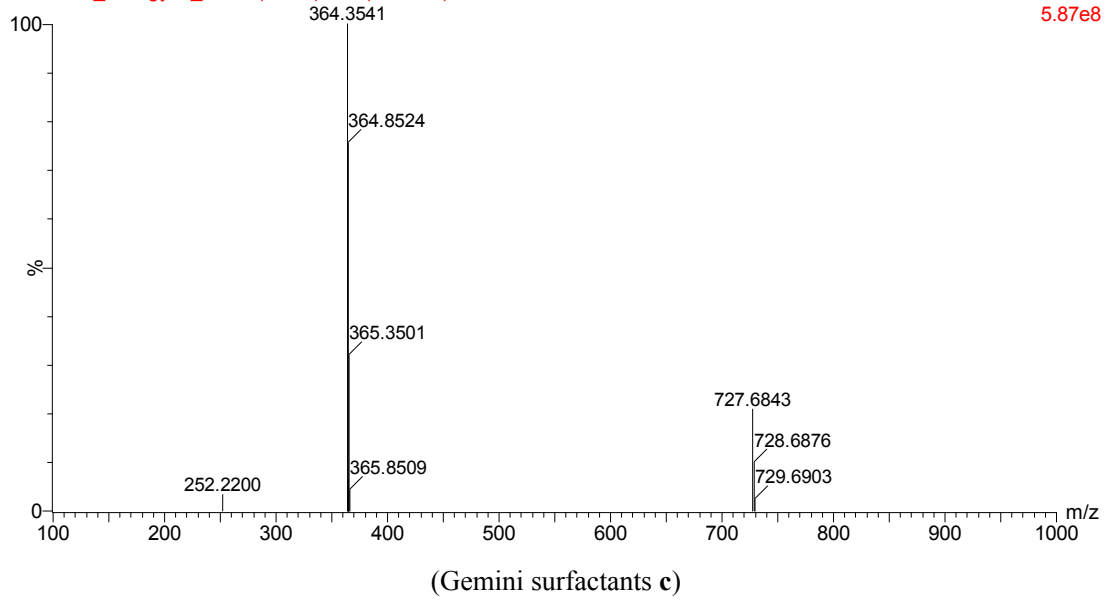

Supplement: c5ra13616d3.pdf [file c5ra13616d3.pdf]
