# Supplementary figures and images for: Synthesis and physiochemical properties of novel gemini surfactants with phenyl-1,4-bis(carbamoylmethyl) spacer
Source: Royal Society of Chemistry journal article supplement (doi:10.1039/c5ra13616d), 2015-01-01

zy-c12

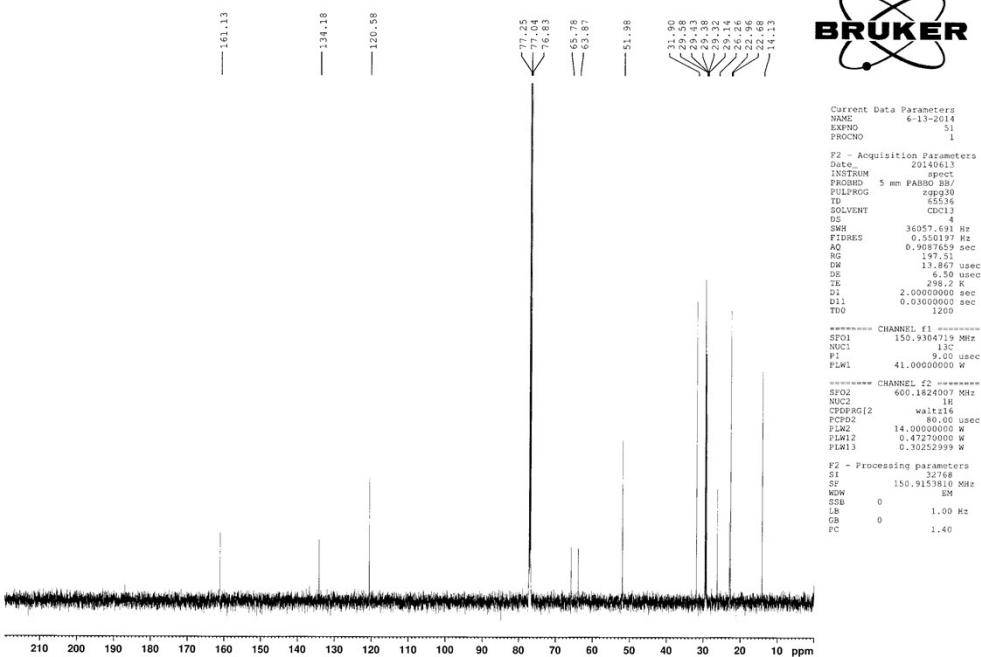

Gemini surfactant a

zy-c14

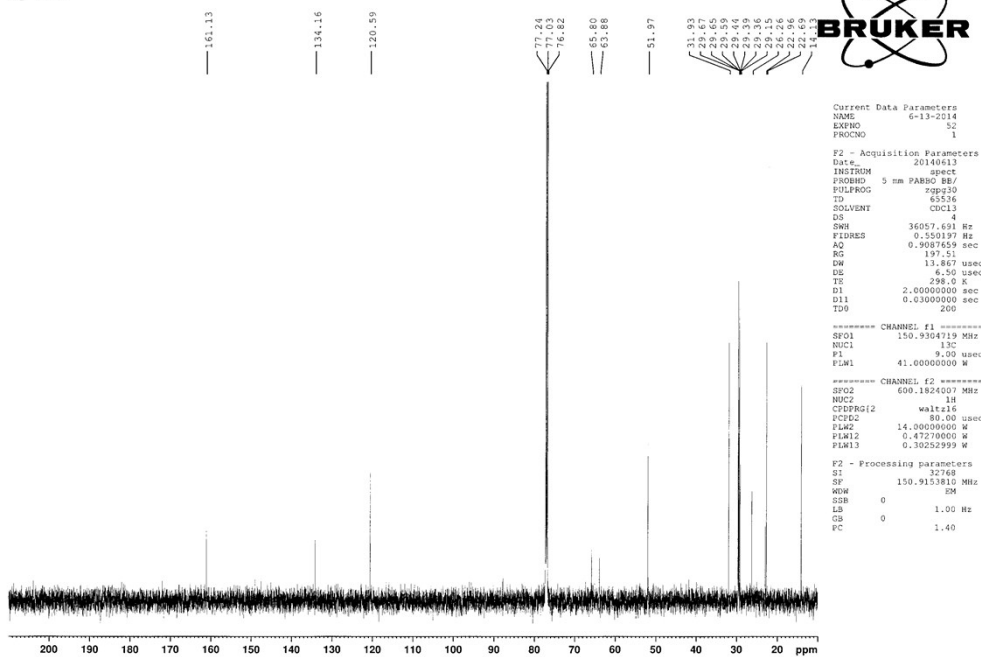

Gemini surfactant b

zy-cl6

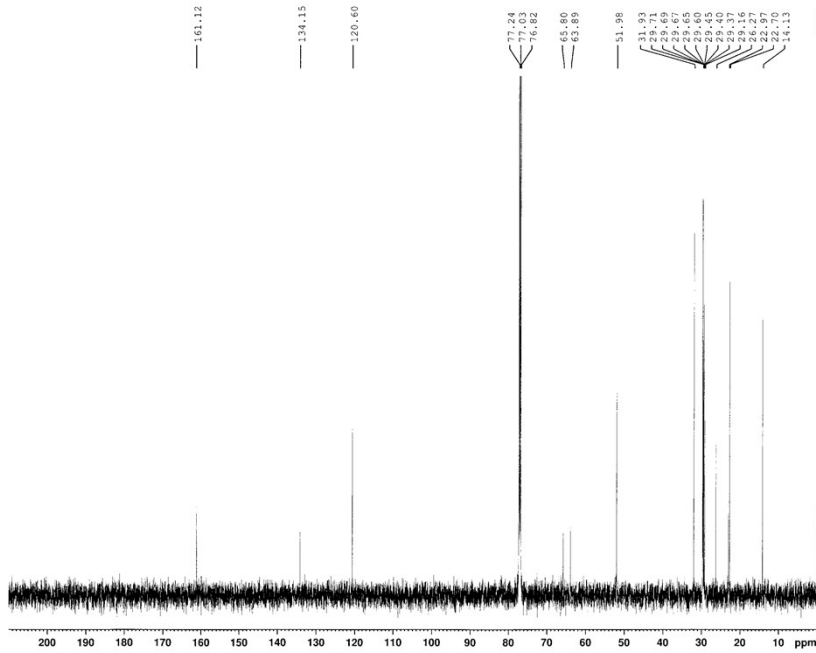

Gemini surfactant c

Supplement: c5ra13616d1.pdf [file c5ra13616d1.pdf]
